# Supplementary material for: Nature-Based Interventions Targeting Elderly People’s Health and Well-Being: An Evidence Map
Source: MDPI journal article supplement (doi:10.3390/ijerph21010112), 2024-01-19
Supplement: s1 [file s1]

## Supplemental Material – Final search strategy

### Nature-based interventions on elderly people's health and well-being: a Systematic Evidence Map

Giulia Catissi, Gabriela Gouveia, Roberta Maria Saviato, Cristiane Pavanello, Raquel Simões de Almeida, Gustavo Borba Benvenuti, Kaue Alves Rosario, Eliseth Ribeiro Leão.

```
(((((("aged"[MeSH Terms]) AND (("nature"[MeSH Terms]) OR ("forests"[MeSH Terms]))) OR  
(("nature"[MeSH Terms]) OR ("forests"[MeSH Terms]) AND (aged[Filter]))) OR  
((((((((((((((((((((((((((((((((("nature based"[Title/Abstract]) OR ("nature therapy"[Title/Abstract]) OR  
("nature contact"[Title/Abstract]) OR ("exposure to nature"[Title/Abstract]) OR ("nature  
interactions"[Title/Abstract]) OR ("nature relatedness"[Title/Abstract]) OR ("nature  
connection"[Title/Abstract]) OR ("nature connections"[Title/Abstract]) OR ("nature  
exposure"[Title/Abstract]) OR ("benefits of nature"[Title/Abstract]) OR ("natural  
environment"[Title/Abstract]) OR ("natural environments"[Title/Abstract]) OR ("connectedness to  
nature"[Title/Abstract]) OR ("nature effect"[Title/Abstract]) OR ("nature sounds"[Title/Abstract]) OR  
("nature elements"[Title/Abstract]) OR ("access to nature"[Title/Abstract]) OR ("nature  
interventions"[Title/Abstract]) OR ("nature scenes"[Title/Abstract]) OR ("nature sound"[Title/Abstract])  
OR ("access to nature"[Title/Abstract]) OR ("nature view"[Title/Abstract]) OR ("nature  
views"[Title/Abstract]) OR ("views of nature"[Title/Abstract]) OR ("nature scenery"[Title/Abstract]) OR  
("activity in nature"[Title/Abstract]) OR ("connectedness to nature"[Title/Abstract]) OR ("nature  
experience"[Title/Abstract]) OR ("contact with nature"[Title/Abstract]) OR ("experiencing  
nature"[Title/Abstract]) OR ("forest therapy"[Title/Abstract]) OR ("forest bathing"[Title/Abstract]) OR  
("shinrin yoku"[Title/Abstract]) OR ("green space"[Title/Abstract]) OR ("blue space"[Title/Abstract])  
OR ("green environment"[Title/Abstract]) OR ("therapeutic garden"[Title/Abstract]) OR ("healing  
garden"[Title/Abstract]) AND (((("elderly"[Title/Abstract]) OR ("aged"[Title/Abstract]) OR ("old  
aged"[Title/Abstract]) OR ("elder"[Title/Abstract]) OR ("aging"[Title/Abstract])))) OR  
((((((((((((((((((((((((((((((((("nature based"[Title/Abstract]) OR ("nature therapy"[Title/Abstract]) OR  
("nature contact"[Title/Abstract]) OR ("exposure to nature"[Title/Abstract]) OR ("nature  
interactions"[Title/Abstract]) OR ("nature relatedness"[Title/Abstract]) OR ("nature  
connection"[Title/Abstract]) OR ("nature connections"[Title/Abstract]) OR ("nature  
exposure"[Title/Abstract]) OR ("benefits of nature"[Title/Abstract]) OR ("natural  
environment"[Title/Abstract]) OR ("natural environments"[Title/Abstract]) OR ("connectedness to  
nature"[Title/Abstract]) OR ("nature effect"[Title/Abstract]) OR ("nature sounds"[Title/Abstract]) OR  
("nature elements"[Title/Abstract]) OR ("access to nature"[Title/Abstract]) OR ("nature  
interventions"[Title/Abstract]) OR ("nature scenes"[Title/Abstract]) OR ("nature sound"[Title/Abstract])  
OR ("access to nature"[Title/Abstract]) OR ("nature view"[Title/Abstract]) OR ("nature  
views"[Title/Abstract]) OR ("views of nature"[Title/Abstract]) OR ("nature scenery"[Title/Abstract]) OR
```

("activity in nature"[Title/Abstract])) OR ("connectedness to nature"[Title/Abstract])) OR ("nature experience"[Title/Abstract])) OR ("contact with nature"[Title/Abstract])) OR ("experiencing nature"[Title/Abstract])) OR ("forest therapy"[Title/Abstract])) OR ("forest bathing"[Title/Abstract])) OR ("shinrin yoku"[Title/Abstract])) OR ("green space"[Title/Abstract])) OR ("blue space"[Title/Abstract])) OR ("green environment"[Title/Abstract])) OR ("therapeutic garden"[Title/Abstract])) OR ("healing garden"[Title/Abstract]) AND (aged[Filter])) OR (((((((((((((((((((((((((((((((((((("nature based"[Text Word]) OR ("nature therapy"[Text Word])) OR ("nature contact"[Text Word])) OR ("exposure to nature"[Text Word])) OR ("nature interactions"[Text Word])) OR ("nature relatedness"[Text Word])) OR ("nature connection"[Text Word])) OR ("nature connections"[Text Word])) OR ("nature exposure"[Text Word])) OR ("benefits of nature"[Text Word])) OR ("natural environment"[Text Word])) OR ("natural environments"[Text Word])) OR ("connectedness to nature"[Text Word])) OR ("nature effect"[Text Word])) OR ("nature sounds"[Text Word])) OR ("nature elements"[Text Word])) OR ("access to nature"[Text Word])) OR ("nature interventions"[Text Word])) OR ("nature scenes"[Text Word])) OR ("nature sound"[Text Word])) OR ("access to nature"[Text Word])) OR ("nature view"[Text Word])) OR ("nature views"[Text Word])) OR ("views of nature"[Text Word])) OR ("nature scenery"[Text Word])) OR ("activity in nature"[Text Word])) OR ("connectedness to nature"[Text Word])) OR ("nature experience"[Text Word])) OR ("contact with nature"[Text Word])) OR ("experiencing nature"[Text Word])) OR ("forest therapy"[Text Word])) OR ("forest bathing"[Text Word])) OR ("shinrin yoku"[Text Word])) OR ("green space"[Text Word])) OR ("blue space"[Text Word])) OR ("green environment"[Text Word])) OR ("therapeutic garden"[Text Word])) OR ("healing garden"[Text Word]) AND (aged[Filter])) OR (((((((((((((((((((((((((((((((((((("nature based"[Text Word]) OR ("nature therapy"[Text Word])) OR ("nature contact"[Text Word])) OR ("exposure to nature"[Text Word])) OR ("nature interactions"[Text Word])) OR ("nature relatedness"[Text Word])) OR ("nature connection"[Text Word])) OR ("nature connections"[Text Word])) OR ("nature exposure"[Text Word])) OR ("benefits of nature"[Text Word])) OR ("natural environment"[Text Word])) OR ("natural environments"[Text Word])) OR ("connectedness to nature"[Text Word])) OR ("nature effect"[Text Word])) OR ("nature sounds"[Text Word])) OR ("nature elements"[Text Word])) OR ("access to nature"[Text Word])) OR ("nature interventions"[Text Word])) OR ("nature scenes"[Text Word])) OR ("nature sound"[Text Word])) OR ("access to nature"[Text Word])) OR ("nature view"[Text Word])) OR ("nature views"[Text Word])) OR ("views of nature"[Text Word])) OR ("nature scenery"[Text Word])) OR ("activity in nature"[Text Word])) OR ("connectedness to nature"[Text Word])) OR ("nature experience"[Text Word])) OR ("contact with nature"[Text Word])) OR ("experiencing nature"[Text Word])) OR ("forest therapy"[Text Word])) OR ("forest bathing"[Text Word])) OR ("shinrin yoku"[Text Word])) OR ("green space"[Text Word])) OR ("blue space"[Text Word])) OR ("green environment"[Text Word])) OR ("therapeutic garden"[Text Word])) OR ("healing garden"[Text Word]) AND (((("elderly"[Text Word]) OR ("aged"[Text Word])) OR ("old aged"[Text Word]) OR ("elder"[Text Word])) OR ("aging"[Text Word]))))
